# Supplementary material
Source: HighWire-hosted journal article supplement (https://svn.smart01.highwire.org/content/svn-2024-003705)
Supplement: inline-supplementary-material-1 [file inline-supplementary-material-1.pdf]

Supplementary Materials

Dual Antiplatelet vs. Alteplase in Anterior and Posterior Circulation  
Minor Stroke:  
A Secondary Analysis of ARAMIS

Content

Methods.....2

Table S1 Baseline Characteristics Compared Between ACS and PCS. ....3

Table S2 Baseline Characteristics Compared Between Before and After  
Propensity Score Matching. ....4

Table S3 Sensitivity Analysis for Primary Outcome. ....6

Table S4. Sensitivity for Improvement in Early Neurological Function. ....7

## Methods

### Definition of Different Populations in the Sensitivity Analysis.

- (1) Full analysis set (ITT) included all participants with valid informed consent will be included in the full analysis set population according to the treatment to which they are randomized, regardless of whether they prematurely discontinue treatment or are otherwise protocol violators/deviators. Participants lost to follow-up or withdrawn will not be included in the full analysis set population.
- (2) Per-protocol (PP) analysis set will be deemed as a sub-population of the full analysis set population and participants will be excluded from the full analysis set population if they did not adhere to study treatment or switched treatment.
- (3) As-treated population is based on the treatment actually received.

Table S1 Baseline Characteristics Compared Between ACS and PCS.

|                                                       | ACS (N=566)      | PCS (N=153)      | P value |
|-------------------------------------------------------|------------------|------------------|---------|
| Age, y                                                | 65 (57-71)       | 64 (55-70)       | 0.27    |
| Sex (Female)                                          | 174 (30.7)       | 49 (32.0)        | 0.76    |
| Current smoker                                        | 205 (36.2)       | 36 (23.5)        | 0.03*   |
| Current drinker <sup>a</sup>                          | 95 (16.8)        | 21 (13.7)        | 0.36    |
| Comorbidities <sup>b</sup>                            |                  |                  |         |
| Hypertension                                          | 289 (51.1)       | 89 (58.2)        | 0.12    |
| Diabetes                                              | 149 (26.3)       | 38 (24.8)        | 0.71    |
| Previous stroke <sup>c</sup>                          | 125 (22.1)       | 34 (22.2)        | 0.97    |
| Previous TIA                                          | 4 (0.7)          | 2 (1.3)          | 0.47    |
| Atrial fibrillation                                   | 1 (0.2)          | 1 (0.7)          | 0.95    |
| Blood pressure at randomization, mmHg                 |                  |                  |         |
| Systolic                                              | 150 (138-163)    | 152 (140-166)    | 0.45    |
| Diastolic                                             | 88 (80-95)       | 89 (81-95)       | 0.19    |
| FBG at randomization, mmol/L                          | 6.40 (5.39-8.17) | 6.21 (5.42-8.19) | 0.58    |
| NIHSS score at randomization <sup>d</sup>             | 2 (1-3)          | 2 (1-3)          | 0.18    |
| Estimated premorbid function (mRS score) <sup>e</sup> |                  |                  |         |
| 0                                                     | 413 (73.0)       | 120 (78.4)       | 0.17    |
| 1                                                     | 153 (27.0)       | 33 (26.5)        |         |
| OTT, min                                              | 182 (133-229)    | 175 (124-227)    | 0.36    |
| Duration of hospitalization, d                        | 8 (6-10)         | 9 (7-12)         | 0.29    |
| Presumed stroke cause <sup>f</sup>                    |                  |                  |         |
| Large artery atherosclerosis                          | 76 (13.5)        | 25 (16.3)        | 0.37    |
| Cardioembolic                                         | 1 (0.2)          | 1 (0.7)          |         |
| Small artery occlusion                                | 125 (22.1)       | 39 (25.5)        |         |
| Other determined cause                                | 5 (0.9)          | 0 (0.0)          |         |
| Undetermined cause                                    | 358 (63.4)       | 88 (57.5)        |         |
| Vessel occlusion                                      | 154 (22.1)       | 46 (30.1)        | 0.13    |
| Large vessel occlusion                                | 29 (5.1)         | 7 (4.6)          | 0.16    |

The data was shown with median (IQR) or number (percentage). Abbreviation: ACS, anterior circulation stroke; DAPT, dual antiplatelet therapy; FBG, fasting blood glucose; mRS, modified Rankin Scale; NIHSS, National Institute of Health Stroke Scale; OTT, time from onset of symptom to intravenous thrombolysis or dual antiplatelet therapy; PCS, posterior circulation stroke; TIA, transient ischemic attack.

<sup>a</sup> Defined as consuming alcohol at least once a week within 1 year prior to the onset of the disease.

<sup>b</sup> The comorbidities were based on the patient or family report.

<sup>c</sup> Previous stroke included ischemic and hemorrhagic stroke.

<sup>d</sup> NIHSS scores range from 0 to 42, with higher scores indicating more severe neurological deficit.

<sup>e</sup> Scores on the mRS of functional disability range from 0 (no symptoms) to 6 (death).

<sup>f</sup> The presumed stroke etiology was classified according to the Trial of Org10172 in Acute Stroke Treatment (TOAST) using clinical findings, brain imaging, and laboratory test results. Other causes included nonatherosclerotic vasculopathies, hypercoagulable states, and hematologic disorder.

Table S2 Baseline Characteristics Compared Between Before and After Propensity Score Matching.

|                                                       | Before Propensity Score Matching |                  |                  |         | After Propensity Score Matching |                  |                   |         |
|-------------------------------------------------------|----------------------------------|------------------|------------------|---------|---------------------------------|------------------|-------------------|---------|
|                                                       | Total (N=719)                    | ACS (N=566)      | PCS (N=153)      | P Value | Total (N=286)                   | ACS (N=143)      | PCS (N=143)       | P Value |
| Age, y                                                | 64 (57-71)                       | 65 (57-71)       | 64 (55-70)       | 0.27    | 65 (56-71)                      | 65 (57-71)       | 64 (56-70)        | 0.91    |
| Sex (Female)                                          | 223 (31.0)                       | 174 (30.7)       | 49 (32.0)        | 0.76    | 88 (30.8)                       | 43 (30.1)        | 45 (31.5)         | 0.80    |
| Current smoker                                        | 241 (33.5)                       | 205 (36.2)       | 36 (23.5)        | 0.03*   | 78 (27.3)                       | 42 (29.4)        | 36 (25.2)         | 0.48    |
| Current drinker <sup>a</sup>                          | 116 (16.1)                       | 95 (16.8)        | 21 (13.7)        | 0.36    | 44 (15.4)                       | 24 (16.8)        | 20 (14.0)         | 0.40    |
| Comorbidities <sup>b</sup>                            |                                  |                  |                  |         |                                 |                  |                   |         |
| Hypertension                                          | 378 (52.6)                       | 289 (51.1)       | 89 (58.2)        | 0.12    | 162 (56.6)                      | 80 (55.9)        | 82 (57.3)         | 0.81    |
| Diabetes                                              | 187 (26.0)                       | 149 (26.3)       | 38 (24.8)        | 0.71    | 64 (22.4)                       | 29 (20.3)        | 35 (24.5)         | 0.40    |
| Previous stroke <sup>c</sup>                          | 159 (22.1)                       | 125 (22.1)       | 34 (22.2)        | 0.97    | 60 (21.0)                       | 29 (20.3)        | 31 (21.7)         | 0.77    |
| Previous TIA                                          | 6 (0.8)                          | 4 (0.7)          | 2 (1.3)          | 0.47    | 2 (0.7)                         | 0 (0.0)          | 2 (1.4)           | 0.16    |
| Atrial fibrillation                                   | 2 (0.3)                          | 1 (0.2)          | 1 (0.7)          | 0.13    | 0 (0.0)                         | 0 (0.0)          | 0 (0.0)           | 0.99    |
| Blood pressure at randomization, mmHg                 |                                  |                  |                  |         |                                 |                  |                   |         |
| Systolic                                              | 150 (138-164)                    | 150 (138-163)    | 152 (140-166)    | 0.45    | 153 (140-167)                   | 155 (140-167)    | 152 (140-166)     | 0.19    |
| Diastolic                                             | 88 (80-95)                       | 88 (80-95)       | 89 (81-95)       | 0.19    | 89 (81-95)                      | 90 (81-95)       | 90 (81-94)        | 0.91    |
| FBG at randomization, mmol/L                          | 6.33 (5.40-8.17)                 | 6.40 (5.39-8.17) | 6.21 (5.42-8.19) | 0.58    | 6.41 (5.57-9.44)                | 6.40 (5.57-9.00) | 6.51 (5.60-10.60) | 0.99    |
| NIHSS score at randomization <sup>d</sup>             | 2 (1-3)                          | 2 (1-3)          | 2 (1-3)          | 0.18    | 2 (1-3)                         | 2 (1-3)          | 2 (1-3)           | 0.99    |
| Estimated premorbid function (mRS score) <sup>e</sup> |                                  |                  |                  |         |                                 |                  |                   |         |
| 0                                                     | 533 (74.1)                       | 413 (73.0)       | 120 (78.4)       | 0.17    | 219 (76.6)                      | 108 (75.5)       | 111 (77.6)        | 0.68    |
| 1                                                     | 186 (25.9)                       | 153 (27.0)       | 33 (26.5)        |         | 67 (23.4)                       | 35 (24.5)        | 32 (22.4)         |         |
| OTT, min                                              | 180 (130-228)                    | 182 (133-229)    | 175 (124-227)    | 0.36    | 176 (125-225)                   | 170 (129-222)    | 180 (124-228)     | 0.64    |
| Duration of hospitalization, d                        | 8 (6-10)                         | 8 (6-10)         | 9 (7-12)         | 0.29    | 8 (7-11)                        | 8 (6-11)         | 8 (7-11)          | 0.91    |

| Presumed stroke cause <sup>f</sup> |            |            |           |      |            |           |           |      |
|------------------------------------|------------|------------|-----------|------|------------|-----------|-----------|------|
| Large artery atherosclerosis       | 101 (14.1) | 76 (13.5)  | 25 (16.3) | 0.37 | 43 (15.0)  | 12 (17.6) | 13 (15.3) | 0.87 |
| Cardioembolic                      | 2 (0.3)    | 1 (0.2)    | 1 (0.7)   |      | 0 (0.0)    | 0 (0.0)   | 0 (0.0)   |      |
| Small artery occlusion             | 164 (22.8) | 125 (22.1) | 39 (25.5) |      | 70 (24.5)  | 34 (23.8) | 36 (25.2) |      |
| Other determined cause             | 5 (0.7)    | 5 (0.9)    | 0 (0.0)   |      | 0 (0.0)    | 0 (0.0)   | 0 (0.0)   |      |
| Undetermined cause                 | 446 (62.1) | 358 (63.4) | 88 (57.5) |      | 173 (60.5) | 86 (60.1) | 87 (60.8) |      |

The data was shown with median (IQR) or number (percentage). Abbreviation: ACS, anterior circulation stroke; DAPT, dual antiplatelet therapy; FBG, fasting blood glucose; mRS, modified Rankin Scale; NIHSS, National Institute of Health Stroke Scale; OTT, time from onset of symptom to intravenous thrombolysis or dual antiplatelet therapy; PCS, posterior circulation stroke; TIA, transient ischemic attack.

a Defined as consuming alcohol at least once a week within 1 year prior to the onset of the disease.

b The comorbidities were based on the patient or family report.

c Previous stroke included ischemic and hemorrhagic stroke.

d NIHSS scores range from 0 to 42, with higher scores indicating more severe neurological deficit.

e Scores on the mRS of functional disability range from 0 (no symptoms) to 6 (death).

f The presumed stroke etiology was classified according to the Trial of Org10172 in Acute Stroke Treatment (TOAST) using clinical findings, brain imaging, and laboratory test results. Other causes included nonatherosclerotic vasculopathies, hypercoagulable states, and hematologic disorder.

Table S3 Sensitivity Analysis for Primary Outcome.

| Group                                                                | No. of events (%) |                | Unadjusted <sup>a</sup>  |                | Adjusted model <sup>b</sup> |                | <i>P</i> <sub>int</sub> <sup>d</sup> value |
|----------------------------------------------------------------------|-------------------|----------------|--------------------------|----------------|-----------------------------|----------------|--------------------------------------------|
|                                                                      | DAPT              | Alteplase      | RD (95% CI) <sup>c</sup> | <i>P</i> value | RD (95% CI) <sup>c</sup>    | <i>P</i> value |                                            |
| Propensity score matching analysis set <sup>e</sup>                  |                   |                |                          |                |                             |                |                                            |
| ACS                                                                  | 59/62 (95.2)      | 72/81 (88.9)   | 6.3 (-2.4 to 15.0)       | 0.16           | 6.4 (0.0 to 12.8)           | 0.05           | 0.35                                       |
| PCS                                                                  | 61/66 (92.4)      | 71/77 (92.2)   | 0.2 (-8.5 to 9.0)        | 0.96           | 0.2 (-8.5 to 9.0)           | 0.96           |                                            |
| Full analysis set                                                    |                   |                |                          |                |                             |                |                                            |
| ACS                                                                  | 266/283 (94.0)    | 256/279 (91.8) | 2.2 (-2.0 to 6.5)        | 0.27           | 2.2 (-2.0 to 6.4)           | 0.31           | 0.99                                       |
| PCS                                                                  | 77/83 (92.8)      | 63/70 (90.0)   | 2.8 (-6.2 to 11.7)       | 0.90           | 2.8 (-6.2 to 11.7)          | 0.90           |                                            |
| Per-protocol analysis set                                            |                   |                |                          |                |                             |                |                                            |
| ACS                                                                  | 205/219 (93.6)    | 205/226 (90.7) | 2.9 (-2.1 to 7.9)        | 0.25           | 2.4 (-1.2 to 5.9)           | 0.19           | 0.70                                       |
| PCS                                                                  | 56/62 (90.3)      | 57/64 (89.1)   | 1.3 (-9.4 to 11.9)       | 0.82           | 1.3 (-9.4 to 11.9)          | 0.82           |                                            |
| Secondary adjusted model <sup>f</sup> of the as-treated analysis set |                   |                |                          |                |                             |                |                                            |
| ACS                                                                  | 256/272 (94.1)    | 266/290 (91.7) | 2.4 (-1.8 to 6.6)        | 0.27           | 1.6 (-1.5 to 4.7)           | 0.32           | 0.53                                       |
| PCS                                                                  | 62/68 (91.2)      | 78/85 (91.8)   | -0.6 (-9.5 to 8.3)       | 0.90           | -0.8 (-6.9 to 5.3)          | 0.80           |                                            |
| IPTW adjusted method <sup>g</sup> for the as-treated analysis set    |                   |                |                          |                |                             |                |                                            |
| ACS                                                                  | 256/272 (94.1)    | 266/290 (91.7) | 2.4 (-1.8 to 6.6)        | 0.27           | 2.0 (-2.2 to 6.3)           | 0.35           | 0.55                                       |
| PCS                                                                  | 62/68 (91.2)      | 78/85 (91.8)   | -0.6 (-9.5 to 8.3)       | 0.90           | -0.3 (-8.6 to 8.0)          | 0.95           |                                            |

Abbreviations: ACS, anterior circulation stroke; CI, confidence interval; DAPT, dual antiplatelet therapy; IPTW, inverse probability of treatment weighting; PCS, posterior circulation stroke; RD, risk difference. \* *P* value <0.05.

<sup>a</sup> Crude analysis in the model.

<sup>b</sup> Adjusted for covariates compared between DAPT and alteplase with *P* value <0.1 in the ACS subgroup. Covariates compared between DAPT and alteplase were balanced in the PCS subgroup.

<sup>c</sup> Calculated using the generalized liner model.

<sup>d</sup> *P* value for interaction was calculated by adjusting covariates compared between ACS and PCS group with *P* value < 0.1 in the analysis set.

<sup>e</sup> Propensity score matching analysis set included patients matched with prespecified covariates in the ARAMIS trial and baseline patient characteristics with *P* value <0.1 between ACS and PCS subgroups in Table 1, under the ratio 1:1, the caliper of 0.01, and a nearest-neighbor matching strategy.

<sup>f</sup> Adjusted for covariates compared between DAPT and alteplase with *P* value <0.1 in each subgroup and prespecified covariates in the ARAMIS trial.

<sup>g</sup> Adjusted for covariates compared between DAPT and alteplase with *P* value <0.1 in each subgroup.

Table S4. Sensitivity for Improvement in Early Neurological Function.

| Outcomes                                                      | Groups | No.(%) of Patients |               | Unadjusted                    |         | Adjusted <sup>a</sup>         |         |
|---------------------------------------------------------------|--------|--------------------|---------------|-------------------------------|---------|-------------------------------|---------|
|                                                               |        | DAPT               | Alteplase     | Treatment difference (95% CI) | P value | Treatment difference (95% CI) | P value |
| END defined with ≥4-point increase in NIHSS score within 24 h | ACS    | 8/274 (2.9)        | 18/292 (6.2)  | -3.2 (-6.6 to 0.2)            | 0.06    | -1.9 (-5.3 to -0.5)           | 0.02*   |
|                                                               | PCS    | 0/68 (0.0)         | 3/85 (3.5)    | -3.5 (NA to NA)               | 0.12    | -3.1 (NA to NA)               | 0.07    |
| NIHSS scoring 0 at 24 h                                       | ACS    | 70/274 (25.5)      | 82/292 (28.1) | -2.5 (-9.8 to 4.8)            | 0.50    | -6.8 (-11.9 to -1.7)          | 0.009*  |
|                                                               | PCS    | 14/68 (20.6)       | 18/85 (21.2)  | -0.6 (-13.5 to 12.4)          | 0.93    | -3.5 (-12.5 to 5.6)           | 0.46    |
